# Supplementary material for: Endogenous Bacteremia Caused by Intestinal Colonization of Carbapenem-Resistant Enterobacteriaceae (CRE) in Immunocompromised Children
Source: MDPI journal article supplement (doi:10.3390/tropicalmed8080402), 2023-08-07
Supplement: s1 [file s1]

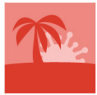

## Supplementary Materials of Endogenous Bacteremia Caused by Intestinal Colonization of Carbapenem-Resistant *Enterobacteriaceae* (CRE) in Immunocompromised Children

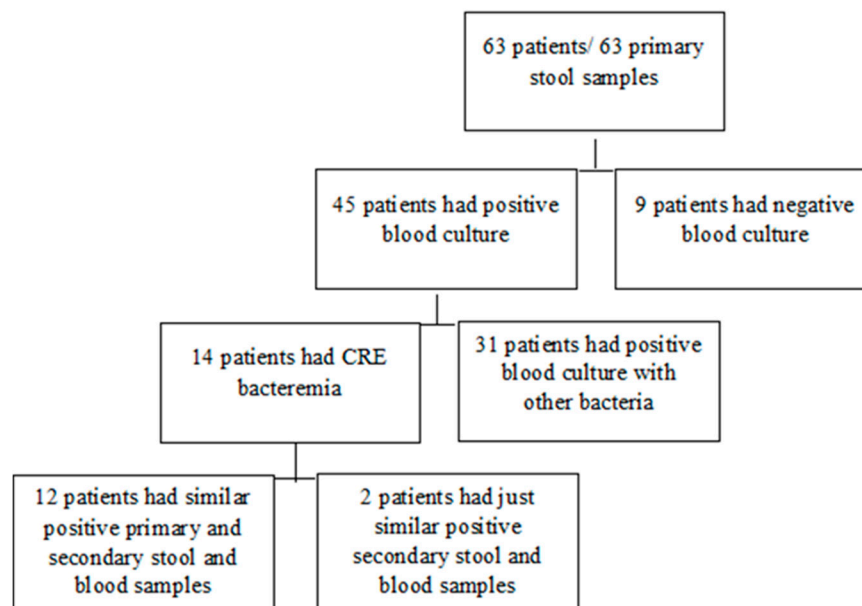

**Figure S1.** Diagram of sampling stages from immunocompromised children.
